# Supplementary material for: Evaluating urinary estrogen and progesterone metabolites using dried filter paper samples and gas chromatography with tandem mass spectrometry (GC–MS/MS)
Source: PubMed Central journal article supplement (PMC6661742; doi:10.1186/s13065-019-0539-1), 2019-02-04

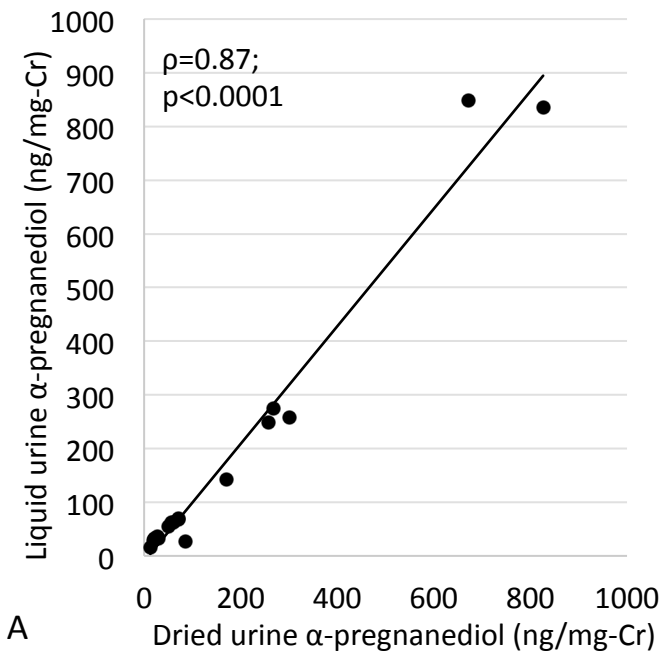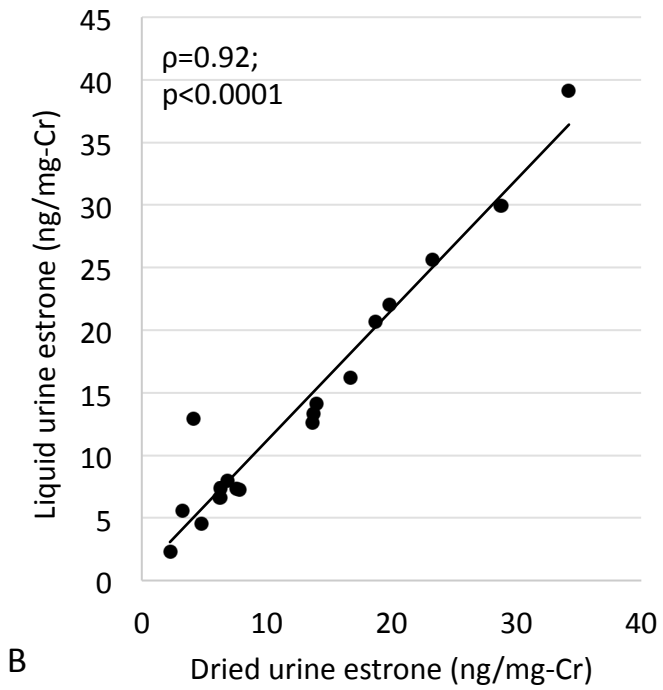

Supplement: 13065_2019_539_MOESM3_ESM.pdf [file 13065_2019_539_MOESM3_ESM.pdf]
